# Supplementary material for: Search for informative polymorphisms in candidate genes: clock genes and circadian behaviour in blue tits
Source: PubMed Central journal article supplement — Genetica. 2008 Sep 16;136(1):109–17. doi: 10.1007/s10709-008-9318-y (PMC2832883; doi:10.1007/s10709-008-9318-y), 2008-09-16
Supplement: 10709_2008_9318_MOESM1_ESM.pdf [file 10709_2008_9318_MOESM1_ESM.pdf]

Supplementary Table: Sequences of primers used to amplify candidate regions in the blue tit.

| Gene name                | Forward primer 5'→3'     | Reverse primer 5'→3'     | T <sub>m</sub> <sup>*</sup> (°C)<br>forward/<br>reverse | Expected<br>length<br>(bp) | PCR conditions <sup>d</sup>             |                             |
|--------------------------|--------------------------|--------------------------|---------------------------------------------------------|----------------------------|-----------------------------------------|-----------------------------|
|                          |                          |                          |                                                         |                            | MgCl <sub>2</sub><br>(endconcentration) | T <sub>annealing</sub> (°C) |
| <i>AANAT</i>             | CRGCRCTGACCCTRCACA       | GTGCTGCATCTCSRYGAAG      | 59/58                                                   | 260 <sup>b</sup>           | 2.0 mM                                  | 57                          |
| <i>CKIδ</i>              | ATTGCTGCWGGMGARGAGGTT    | TCCWCCCTGCATCATYTTGT     | 59/56                                                   | 100 <sup>b</sup>           | 2.0 mM                                  | 56                          |
| <i>CKIε</i>              | GCAAGARGTGTCACGGAT       | CTAAGCAAACACTGGTCC       | 54/53                                                   | 460 <sup>b</sup>           | 2.0 mM                                  | 49                          |
| <i>CKIε (tau)</i>        | GCTGGTGTGGAGGGTTAAAT     | TCCCAGGTGGGTGTTGAT       | 57/56                                                   | 435 <sup>b</sup>           | 1.5 mM                                  | 55                          |
| <i>CKIε (dbt)</i>        | ATGATCTTCTCAGCAGGGGA     | GAGAGTAGGCACAAATGCTTCC   | 57/60                                                   | 250 <sup>b</sup>           | 1.0 mM                                  | 55                          |
| <i>PERIOD2</i>           | CTCTACTGTGTTGAAGKCATCTG  | CTAATTCAGGTTGTGGYTTTTTG  | 59/56                                                   | 170 <sup>b</sup>           | 2.0 mM                                  | 55                          |
| <i>ADCYAP1</i>           | GATGTGAGTAACCAGCCACT     | ATAACACAGGAGCGGTGA       | 57/53                                                   | 166 <sup>c</sup>           | 1.5 mM                                  | 51                          |
| <i>CLOCK<sup>a</sup></i> | TTTTCTCAAGGTCAGCAGCTTGT  | CTGTAGGAACTGTTGYGGKTGCTG | 58/64                                                   | 285 <sup>c</sup>           |                                         |                             |
| <i>CREB1</i>             | GGTCAGGCAGTTAAGATATTG    | GTCTTACCAGTGGTTCCTTTAR   | 55/57                                                   | 556 <sup>c</sup>           | 2.0 mM                                  | 53                          |
| <i>NPAS2</i>             | CTGTGGTAAATTTGATGATTCTGA | ACACCAAGTTCCTTGCACAATG   | 55/56                                                   | 184 <sup>c</sup>           | 2.0 mM                                  | 55                          |

\* approximate melting temperature

<sup>a</sup> primers according to Johnson et al. 2007

<sup>b</sup> approximate length

<sup>c</sup> contains maximum number of repeats obtained in the sample of 148 blue tit individuals

<sup>d</sup> PCRs were conducted in a final volume of 20 µl containing 1 µl of genomic DNA and 0.5 U Taq DNA polymerase (Fermentas), and a final concentration of 200 µM dNTPs, 0.5 µM of each of the forward and reverse primers, varying MgCl<sub>2</sub> concentrations (see table) and 1X Taq buffer with (NH<sub>4</sub>)<sub>2</sub>SO<sub>4</sub> (Fermentas). PCR cycling profiles for all markers began with an initial denaturation at 95°C for 3 min and then proceeded with 30-35 cycles of 95°C for 30 sec, annealing temperatures according to the table for 30 sec, and 72°C for 1 min, followed by a final extension of 72°C for 7 min.
